# Supplementary material for: A high proportion of red snapper sold in North Carolina is mislabeled
Source: PeerJ. 2020 Jun 25;8:e9218. doi: 10.7717/peerj.9218 (PMC7321663; doi:10.7717/peerj.9218)
Supplement: Supplemental Information 1 [file peerj-08-9218-s001.xlsx]

## Sheet: Sheet1
Vendor	Mislabeled	sci	common
Market	Y	Rhomboplites aurorubens	Vermilion Snapper
Grocery	N	Lutjanus campechanus	Red Snapper
Restaurant	Y	Oreochromis niloticus	Nile Tilapia
Restaurant	Y	Oreochromis niloticus	Nile Tilapia
Restaurant	Y	Orechromis niloticus	Nile Tilapia
Grocery	Y	Ocyurus chrysurus	Yellow Tail Snapper
Grocery	Y	Lutjanus synagris/guttatus	Lane Snapper/Spotted Rose Snapper
Grocery	Y	Lutjanus synagris	Lane Snapper
Market	Y	Rhomboplites aurorubens	Vermilion Snapper
Grocery	Y	Lutjanus erythropterus/ malabaricus	Crimson/ Saddletail Snapper
Grocery	Y	Lutjanus synagris/ guttatus	Lane Snapper
Restaurant	Y	Pagrus major	Red Seabream
Restaurant	Y	Oreochromis niloticus	Nile Tilapia
Restaurant	Y	Oreochromis niloticus	Nile Tilapia
Restaurant	Y	Oreochromis niloticus	Nile Tilapia
Restaurant	Y	Pagrus auratus/major	Australasian Snapper/ Red Seabream
Grocery	N	Lutjanus campechanus	Red Snapper
Restaurant	Y	Lutjanus guttatus/ synagris	Rose snapper/ Lane snapper
Restaurant	Y	Lutjanus guttatus/ synagris	Rose snapper/ Lane snapper
Restaurant	Y	Oreochromis niloticus	Nile Tilapia
Restaurant	Y	Oreochromis niloticus	Nile Tilapia
Market	Y	Rhomboplites aurobens	Vermillion Snapper
Market	Y	Rhomboplites aurobens	Vermillion Snapper
Market	Y	Rhomboplites aurobens	Vermillion Snapper
Grocery	Y	Lutajanus erythropterus	Crimson snapper
Grocery	N	Lutjanus purpureus	Southern red snapper
Market	Y	Rhomboplites Aurobens	Vermillion Snapper
Market	Y	Rhomboplites aurorubens	Vermillion Snapper
Market	Y	Rhomboplites aurobens	Vermillion Snapper
Market	Y	Rhomboplites aurobens	Vermillion Snapper
Grocery	N	Lutjanus campechanus/pupureus	Northern/Southern Red Snapper
Restaurant	Y	Oreochromis niloticus	Nile Tilapia
Market	Y	Rhomboplites aurorubens	Vermillion Snapper
Market	Y	Rhomboplites aurorubens	Vermillion Snapper
Grocery	Y	Lutjanus guttatus/ synagris	Spotted rose/ lane snapper
Restaurant	Y	Oreochromis niloticus	Nile Tilapia
Grocery	Y	Lutjanus synagris	Lane Snapper
Grocery	Y	Lutjanus synagris/ guttatas	Lane Snapper/ Spotted Rose
Grocery	Y	Lutjanus synagris; Lutjanus guttatus	Lane snapper; spotted rose snapper
Restaurant	Y	Oreochromis niloticus	Nile Tilapia
Grocery	Y	Rhomboplites aurorubens	Vermillian Snapper
Grocery	Y	Rhomboplites aurorubens	Vermillian Snapper
Restaurant	Y	Oreochromis aureus	Blue tilapia
Restaurant	Y	Oreochromis niloticus	Nile Tilapia
Restaurant	Y	Oreochromis niloticus	Nile Tilapia
Grocery	Y	Rhomboplites aurorubens	Vermillion snapper
Grocery	N	Lutjanus campechanus	Northern Red Snapper
Market	Y	Rhomboplites aurorubens	Vermilion Snapper
Restaurant	Y	Oreochromis niloticus	Nile Tilapia
Grocery	Y		Vermillion Snapper
Grocery	Y	Rhomboplites aurorubens	Vermillion Snapper
Market	Y	Rhomboplites aurorubens	Vermillion snapper
