# Supplementary material for: A high proportion of red snapper sold in North Carolina is mislabeled
Source: PeerJ. 2020 Jun 25;8:e9218. doi: 10.7717/peerj.9218 (PMC7321663; doi:10.7717/peerj.9218)
Supplement: Supplemental Information 3 [file peerj-08-9218-s003.xlsx]

## Sheet: red snapper sequences_V6
ID	Date Collected	Restaurant or Grocery	Location	Price		Real Identity - Sceintific Name	Real Identity - Common Name	% Identity	Query Cover	E value	Mislabeled? (via GenBank)	Seq file name	Sequence	Genbank accession numbers
75	2017-10-03	Restaurant	Raleigh	$7.58 (w/ tax)	1	Pagrus auratus/major	Australasian snapper/red seabream	100	100	0	YES	S3_EP__75_SpeciesPagrusMajor, PagrusAuratus	CGACGACCAGATTTATAATGTAATTGTTACAGCACACGCATTTGTAATAATTTTCTTTATAGTAATGCCAATTATGATTGGGGGCTTTGGAAACTGATTAATTCCACTTATAATTGGTGCCCCTGATATGGCCTTCCCCCGAATGAACAACATAAGCTTCTGACTACTCCCCCCATCTTTCCTTCTTCTACTCGCTTCCTCCGGGGTTGAAGCCGGGGCTGGCACTGGGTGAACAGTTTATCCACCACTGGCGGGTAATCTTGCCCATGCAGGAGCATCAGTCGACCTAACCATCTTTTCTCTTCACTTAGCGGGTATTTCATCAATTCTTGGTGCAATTAACTTTATTACTACCATCATCAATATGAAACCCCCTGCTATTTCCCAGTATCAGACCCC…	BankIt2342942 Seq1 MT525046
104	Oct 21,2017	Restaurant	Charlotte	$1.00 + tax /1 Nigiri	2	Oreochromis aureus	Blue tilapia	1	1	0	YES	18G_003_S3AL104_M13F_C10	TAGGAACCGCGCTAAGCCTCCTAATTCGGGCAGAACTAAGCCAGCCCGGCTCTCTCCTCGGAGACGACCAGATTTATAATGTAATTGTTACAGCACATGCTTTTGTAATAATTTTCTTTATAGTAATGCCAATTATGATTGGAGGCTTTGGAAACTGACTAGTACCACTCATGATTGGTGCTCCAGATATGGCCTTCCCTCGAATGAACAACATGAGTTTCTGACTCCTCCCTCCCTCATTCCTCCTCCTCCTCGCCTCATCTGGAGTCGAAGCAGGTGCCGGCACAGGGTGAACTGTTTACCCCCCGCTCGCAGGCAATCTTGCCCATGCTGGGCCTTCTGTCGACTTAACCATCTTCTCCCTCCACTTGGCCGGGGTGTCATCTATTCTAGGCGCAA…	BankIt2342942 Seq2 MT525047
105	2017-10-12	Grocery	Chapel Hill	$8.99/lb	3	Lutajanus erythropterus	Crimson snapper	0.99	0.97	0	YES	20D_018_S3MF84_M13F_B09 _3_	CCTAAGCCTGCTCATTCGAGCAGAACTTAGCCAACCAGGCGCCCTTCTTGGAGACGACCAGATTTATAATGTAATCGTTACAGCACATGCATTCGTAATGATTTTCTTTATAGTAATACCAATTATGATCGGAGGATTCGGAAACTGGCTAATCCCTCTTATGATCGGTGCCCCAGACATAGCATTCCCCCGAATAAATAATATGAGCTTTTGGCTTCTGCCCCCCTCTTTCCTTCTTCTGCTCGCATCTTCTGGAGTAGAGGCCGGGGCCGGAACCGGGTGAACAGTCTACCCTCCACTAGCGGGGAATCTAGCACATGCAGGAGCATCTGTTGACCTAACCATCTTTTCTCTCCACCTAGCCGGGGTCTCTTCAATCCTTGGTGCTATCAATTTTAT…	BankIt2342942 Seq3 MT525048
106	Sept. 21, 2017	Grocery	Chapel Hill	$13.99/lb + .04 tax	4	Lutjanus erythropterus/malabaricus	Crimson/saddletail Snapper	100% / 100%	100% / 100%	0 / 0	YES	17W_004_S369KL_M13F_A12_1_	AAGCCTGCTCATTCGAGCAGAACTTAGTCAACCAGGGGCCCTCCTTGGGGACGACCAGATCTACAATGTAATCGTTACGGCACATGCATTCGTAATGATTTTCTTTATAGTAATGCCAATCATAATCGGGGGATTTGGAAACTGACTAATCCCACTTATAATCGGAGCCCCCGACATGGCATTCCCCCGAATAAATAACATGAGCTTTTGACTTCTGCCCCCCTCTTTCCTTCTCCTGCTCGCATCTTCTGGGGTCGAAGCTGGAGCCGGAACCGGATGAACAGTTTATCCTCCATTGGCAGGGAACCTGGCACACGCAGGAGCATCTGTTGACCTAACCATCTTTTCTCTTCATCTAGCAGGGGTCTCTTCAATCCTCGGGGCTATTAATTTTATTAC…	BankIt2342942 Seq4 MT525049
98	2017-10-22	Grocery	Charlotte	$13.99/lb	5	Lutjanus synagris	Lane snapper	1	0.98	0	YES	18G_005_S3AB98_M13F_E10	CGAGCAGAACTAAGCCAGCCAGGAGCTCTTCTTGGAGACGACCAGATTTATAATGTAATTGTTACAGCACATGCATTTGTAATAATTTTCTTTATAGTAATACCAATCATGATCGGAGGATTCGGGAACTGACTGATCCCATTAATAATCGGAGCCCCTGATATGGCATTCCCTCGAATAAATAACATGAGCTTTTGACTCCTTCCGCCATCATTCCTATTGCTACTCGCCTCTTCTGGAGTAGAAGCCGGTGCTGGAACTGGGTGAACAGTCTACCCTCCCCTAGCAGGAAACCTGGCACACGCGGGAGCATCTGTAGACCTAACTATTTTCTCCCTGCATTTAGCAGGTGTCTCTTCAATTCTAGGGGCCATCAACTTCATCACAACAATTATTAAC…	BankIt2342942 Seq5 MT525050
107	Oct. 1, 2017	Grocery	Carrboro	$13.99/lb	6	Lutjanus guttatus/synagris	Lane snapper	99% / 99%	100% / 100%	0 / 0	YES	S3_CM_70_Lutjanussynagris	AATACCAATCATGATCGGAGGATTCGGGAACTGACTGATCCCATTAATAATCGGAGCCCCTGATATGGCATTCCCTCGAATAAATAACATGAGCTTTTGACTCCTTCCGCCATCATTCCTATTGCTACTCGCCTCTTCTGGAGTAGAAGCCGGTGCTGGAACTGGGTGAACAGTCTACCCTCCCCTAGCAGGAAACCTGGCACACGCGGGAGCATCTGTAGACCTAACTATTTTCTCCCTGCATTTAGCAGGTGTCTCTTCAATTCTAGGGGCCATCAACTTCATCACAACAATTATTAACATGAAACCCCCTGCTATCTCCCAGTATCAAACACCCCTATTCGTTTGAGCCGTTCTAATTACGGCTGTTCTACTTCTTCTCTCTCTACCAGGTTTAGC…	BankIt2342942 Seq6 MT525051
63	Sept. 21, 2017	Restaurant	Carrboro	$8.60/ 8 pieces + tax	7	Oreochromis niloticus	Nile tilapia	1	1	0	YES	20G_006_S3CJM63_M13F_F08	GCTTGAGCGGGAATAGTAGGAACTGCACTAAGCCTCCTAATTCGGGCAGAACTAAGCCAGCCCGGCTCTCTTCTCGGAGACGACCAAATCTATAATGTAATTGTTACAGCACATGCTTTCGAAATAATTTTCTTTATAGGAATACCAATTATGATTGGAGGCTTTGGAAACTGACTAGTACCCCTCATGATTGGTGCACCAGACATGGCCTTCCCTCGAATAAATAACATGAGCTTTTGACTTCTCCCCCCCTCATTTCTTCTTCTTCTCGCCTCATCTGGAGTCGAAGCAGGTGCCGGCACAGGATGGACTGTTTATCCCCCGCTCGCAGGCAATCTTGCCCACGCTGGACCTTCTGTTGACTTAACCATCTTCTCCCTCCACTTGGCCGGAGTGTCA…	BankIt2342942 Seq7 MT525052
64	Sept. 21, 2017	Restaurant	Durham	BOGO 4 pieces $4.85 +.36 tax	8	Oreochromis niloticus	Nile tilapia	0.99	0.96	0	YES	S3_KP_64_Nile Tilapia	CTGCACTAAGCCTCCTAATTCGGGCAGAACTAAGCCAGCCCGGCTCTCTTCTCGGAGACGACCAAATCTATAATGTAATTGTTACAGCACATGCTTTCGTAATAATTTTCTTTATAGTAATACCAATTATGATTGGAGGCTTTGGAAACTGACTAGTACCCCTCATGATTGGTGCACCAGACATGGCCTTCCCTCGAATAAATAACATGAGCTTTTGACTTCTCCCCCCCTCATTTCTTCTTCTTCTCGCCTCATCTGGAGTCGAAGCAGGTGCCGGCACAGGATGGACTGTTTATCCCCCGCTCGCAGGCAATCTTGCCCACGCTGGACCTTCTGTTGACTTAACCATCTTCTCCCTCCACTTGGCCGGAGTGTCATCTATTTTAGGTGCAATTAATT…	BankIt2342942 Seq8 MT525053
65	2017-10-03	Restaurant	Raleigh	$8.39 (w/ tax)	9	Oreochromis niloticus	Nile tilapia	1	1	0	YES	S3_DJ__74_Pagrus Major	AGCCTGCTCATCCGAGCTGAGCTTAGCCAGCCCGGGGCTCTCCTAGGCGACGACCAGATTTATAATGTAATTGTTACAGCACACGCATTTGTAATAATTTTCTTTATAGTAATGCCAATTATGATTGGGGGCTTTGGAAACTGATTAATTCCACTTATAATTGGTGCCCCTGATATGGCCTTCCCCCGAATGAACAACATAAGCTTCTGACTACTCCCCCCATCTTTCCTTCTTCTACTCGCTTCCTCCGGGGTTGAAGCCGGGGCTGGCACTGGGTGAACAGTTTATCCACCACTGGCGGGTAATCTTGCCCATGCAGGAGCATCAGTCGACCTAACCATCTTTTCTCTTCACTTAGCGGGTATTTCATCAATTCTTGGTGCAATTAACTTTATTACT…	BankIt2342942 Seq9 MT525054
66	2017-10-20	Restaurant	Winston Salem	$4.50/ 2 Nigiri	10	Oreochromis niloticus	Nile tilapia	1	1	0	YES	21B_010_S3KL91_M13F_B05_4_	GCTTGAGGCGGAATAGTAGGAACTGCACTAAGCCTCCTAATTCGGGCAGAACTAAGCCAGCCCGGCTCTCTTCTCGGAGACGACCAAATCTATAATGTAATTGTTACAGCACATGCTTTCGTAATAATTTTCTTTATAGTAATACCAATTATGATTGGAGGCTTTGGAAACTGACTAGTACCCCTCATGATTGGTGCACCAGACATGGCCTTCCCTCGAATAAATAACATGAGCTTTTGACTTCTCCCCCCCTCATTTCTTCTTCTTCTCGCCTCATCTGGAGTCGAAGCAGGTGCCGGCACAGGATGGACTGTTTATCCCCCGCTCGCAGGCAATCTTGCCCACGCTGGACCTTCTGTTGACTTAACCATCTTCTCCCTCCACTTGGCCGGAGTGTCA…	BankIt2342942 Seq10 MT525055
67	2017-10-05	Restaurant	Raleigh	$3.75/2 pieces +tax	11	Oreochromis niloticus	Nile tilapia	1	1	0	YES	23C_015_S3JCD72_M13F_G08	TCCTAATTCGGGCAGAACTAAGCCAGCCCGGCTCTCTTCTCGGAGACGACCAAATCTATAATGTAATTGTTACAGCACATGCTTTCGTAATAATTTTCTTTATAGTAATACCAATTATGATTGGAGGCTTTGGAAACTGACTAGTACCCCTCATGATTGGTGCACCAGACATGGCCTTCCCTCGAATAAATAACATGAGCTTTTGACTTCTCCCCCCCTCATTTCTTCTTCTTCTCGCCTCATCTGGAGTCGAAGCAGGTGCCGGCACAGGATGGACTGTTTATCCCCCGCTCGCAGGCAATCTTGCCCACGCTGGACCTTCTGTTGACTTAACCATCTTCTCCCTCCACTTGGCCGGAGTGTCATCTATTTTAGGTGCAATTAATTTTATCACAACCA…	BankIt2342942 Seq11 MT525056
68	2017-10-03	Restaurant	Raleigh	$4.50 +tax	12	Oreochromis niloticus	Nile tilapia	1	1	0	YES	23C_012_KDL73_M13F_D08_1_	CTCCTAATTCGGGCAGAACTAAGCCAGCCCGGCTCTCTTCTCGGAGACGACCAAATCTATAATGTAATTGTTACAGCACATGCTTTCGTAATAATTTTCTTTATAGTAATACCAATTATGATTGGAGGCTTTGGAAACTGACTAGTACCCCTCATGATTGGTGCACCAGACATGGCCTTCCCTCGAATAAATAACATGAGCTTTTGACTTCTCCCCCCCTCATTTCTTCTTCTTCTCGCCTCATCTGGAGTCGAAGCAGGTGCCGGCACAGGATGGACTGTTTATCCCCCGCTCGCAGGCAATCTTGCCCACGCTGGACCTTCTGTTGACTTAACCATCTTCTCCCTCCACTTGGCCGGAGTGTCATCTATTTTAGGTGCAATTAATTTTATCACAACC…	BankIt2342942 Seq12 MT525057
69	2017-10-05	Restaurant	Durham	$4.30/2 pieces	13	Oreochromis niloticus	Nile tilapia	1	1	0	YES	S3_PD__79_Oreochromisniloticusab1	CCTAATTCGGGCAGAACTAAGCCAGCCCGGCTCTCTTCTCGGAGACGACCAAATCTATAATGTAATTGTTACAGCACATGCTTTCGTAATAATTTTCTTTATAGTAATACCAATTATGATTGGAGGCTTTGGAAACTGACTAGTACCCCTCATGATTGGTGCACCAGACATGGCCTTCCCTCGAATAAATAACATGAGCTTTTGACTTCTCCCCCCCTCATTTCTTCTTCTTCTCGCCTCATCTGGAGTCGAAGCAGGTGCCGGCACAGGATGGACTGTTTATCCCCCGCTCGCAGGCAATCTTGCCCACGCTGGACCTTCTGTTGACTTAACCATCTTCTCCCTCCACTTGGCCGGAGTGTCATCTATTTTAGGTGCAATTAATTTTATCACAACCAT…	BankIt2342942 Seq13 MT525058
70	2017-10-05	Restaurant	Durham	$9.62/ 2 pieces	14	Oreochromis niloticus	Nile tilapia	1	0.9	1e-82	YES	S3_MF_80_Oreochromis Niloticus	GCCTCCTAATTCGGGCAGAACTAAGCCAGCCCGGCTCTCTTCTCGGAGACGACCAAATCTATAATGTAATTGTTACAGCACATGCTTTCGTAATAATTTTCTTTATAGTAATACCAATTATGATTGGAGGCTTTGGAAACTGACTAGTACCCCTCATGATTGGTGCACCAGACATGGCCTTCCCTCGAATAAATAACATGAGCTTTTGACTTCTCCCCCCCTCATTTCTTCTTCTTCTCGCCTCATCTGGAGTCGAAGCAGGTGCCGGCACAGGATGGACTGTTTATCCCCCGCTCGCAGGCAATCTTGCCCACGCTGGACCTTCTGTTGACTTAACCATCTTCTCCCTCCACTTGGCCGGAGTGTCATCTATTTTAGGTGCAATTAATTTTATCACAA…	BankIt2342942 Seq14 MT525059
97	2017-10-22	Restaurant	Charlotte	$4.49/ 2 Nigiri	15	Oreochromis niloticus	Nile tilapia	1	1	0	YES	S3_KP_97_Nile Tilapia	CGGGCAGAACTAAGCCAGCCCGGCTCTCTTCTCGGAGACGACCAAATCTATAATGTAATTGTTACAGCACATGCTTTCGTAATAATTTTCTTTATAGTAATACCAATTATGATTGGAGGCTTTGGAAACTGACTAGTACCCCTCATGATTGGTGCACCAGACATGGCCTTCCCTCGAATAAATAACATGAGCTTTTGACTTCTCCCCCCCTCATTTCTTCTTCTTCTCGCCTCATCTGGAGTCGAAGCAGGTGCCGGCACAGGATGGACTGTTTATCCCCCGCTCGCAGGCAATCTTGCCCACGCTGGACCTTCTGTTGACTTAACCATCTTCTCCCTCCACTTGGCCGGAGTGTCATCTATTTTAGGTGCAATTAATTTTATCACAACCATTATTAAC…	BankIt2342942 Seq15 MT525060
101	2017-10-20	Restaurant	Boone	$1.50 + tax /1 Nigiri	16	Oreochromis niloticus	Nile tilapia	1	1	0	YES	20D_016_S3CJM101_M13F_H08	ACTGCACTAAGCCTCCTAATTCGGGCAGAACTAAGCCAGCCCGGCTCTCTTCTCGGAGACGACCAAATCTATAATGTAATTGTTACAGCACATGCTTTCGTAATAATTTTCTTTATAGTAATACCAATTATGATTGGAGGCTTTGGAAACTGACTAGTACCCCTCATGATTGGTGCACCAGACATGGCCTTCCCTCGAATAAATAACATGAGCTTTTGACTTCTCCCCCCCTCATTTCTTCTTCTTCTCGCCTCATCTGGAGTCGAAGCAGGTGCCGGCACAGGATGGACTGTTTATCCCCCGCTCGCAGGCAATCTTGCCCACGCTGGACCTTCTGTTGACTTAACCATCTTCTCCCTCCACTTGGCCGGAGTGTCATCTATTTTAGGTGCAATTAAT…	BankIt2342942 Seq16 MT525061
111	2017-10-29	Restaurant	Greensboro	$4.95+0.33 tax/ 2 nigiri	17	Oreochromis niloticus	Nile tilapia	1	1	0	YES	20D_014_S3KDL111_M13F_F08	AAGCCTCCTAATTCGGGCAGAACTAAGCCAGCCCGGCTCTCTTCTCGGAGACGACCAAATCTATAATGTAATTGTTACAGCACATGCTTTCGTAATAATTTTCTTTATAGTAATACCAATTATGATTGGAGGCTTTGGAAACTGACTAGTACCCCTCATGATTGGTGCACCAGACATGGCCTTCCCTCGAATAAATAACATGAGCTTTTGACTTCTCCCCCCCTCATTTCTTCTTCTTCTCGCCTCATCTGGAGTCGAAGCAGGTGCCGGCACAGGATGGACTGTTTATCCCCCGCTCGCAGGCAATCTTGCCCACGCTGGACCTTCTGTTGACTTAACCATCTTCTCCCTCCACTTGGCCGGAGTGTCATCTATTTTAGGTGCAATTAATTTTATCAC…	BankIt2342942 Seq17 MT525062
105	2017-10-22	Restaurant	Knightdale	$5.00 +tax/4 Nigiri (BOGO)	18	Oreochromis niloticus	Nile tilapia	1	1	0	YES	15D_009_S3JCD105_M13F_A06	TGAGCCGGATAGTAGGAACTGCACTAAGCCTCCTAATTCGGGCAGAACTAAGCCAGCCCGGCTCTCTTCTCGGAGACGACCAAATCTATAATGTAATTGTTACAGCACATGCTTTCGTAATAATTTTCTTTATAGTAATACCAATTATGATTGGAGGCTTTGGAAACTGACTAGTACCCCTCATGATTGGTGCACCAGACATGGCCTTCCCTCGAATAAATAACATGAGCTTTTGACTTCTCCCCCCCTCATTTCTTCTTCTTCTCGCCTCATCTGGAGTCGAAGCAGGTGCCGGCACAGGATGGACTGTTTATCCCCCGCTCGCAGGCAATCTTGCCCACGCTGGACCTTCTGTTGACTTAACCATCTTCTCCCTCCACTTGGCCGGAGTGTCATCTA…	BankIt2342942 Seq18 MT525063
106	2017-10-20	Grocery	Greensboro	$10.99/lb sale	19	Lutjanus campechanus/pupureus	Northern/Southern red snapper	1	1	0	NO	21B_009_S3KL90_M13F_A05_2_	GCCTGCTCATTCGAGCAGAGCTAAGCCAGCCAGGAGCTCTTCTTGGAGACGACCAGATTTATAATGTAATTGTTACAGCACACGCATTTGTAATAATTTTCTTTATAGTAATACCAATCATGATCGGAGGATTCGGGAACTGACTGATCCCATTAATAATTGGAGCCCCTGATATGGCATTCCCCCGAATAAATAACATGAGCTTTTGACTCCTCCCCCCGTCATTCCTGTTACTGCTCGCCTCTTCTGGAGTAGAAGCCGGTGCTGGAACTGGGTGGACAGTCTACCCGCCCCTAGCAGGCAACCTAGCACACGCAGGAGCATCTGTAGACCTAACTATTTTCTCCCTACATCTGGCAGGTGTCTCCTCAATTCTAGGGGCCATTAATTTCATCACAA…	BankIt2342942 Seq19 MT525064
107	2017-10-01	Restaurant	Raleigh	$7.50/3 pieces +tax	20	Pagrus major	Red seabream	0.99	0.98	0	YES	17W_006_S3DJ71_M13F_C12	GCCTGCTCATCCGAGCTGAGCTTAGCCAGCCCGGGGCTCTCCTAGGCGACGACCAGATTTATAATGTAATTGTTACAGCACACGCATTTGTAATAATTTTCTTTATAGTAATGCCAATTATGATTGGGGGCTTTGGAAACTGATTAATTCCACTTATAATTGGTGCCCCTGATATGGCCTTCCCCCGAATGAACAACATAAGCTTCTGACTACTCCCCCCATCTTTCCTTCTTCTACTCGCTTCCTCCGGGGTTGAAGCCGGGGCTGGCACTGGGTGAACAGTTTATCCACCACTGGCGGGTAATCTTGCCCATGCAGGAGCATCAGTCGACCTAACCATCTTTTCTCTTCACTTAGCGGGTATTTCATCAATTCTTGGTGCAATTAACTTTATTACTA…	BankIt2342942 Seq20 MT525065
61	Sept. 21, 2017	Grocery	Chapel Hill	$26.99/lb	21	Lutjanus campechanus	Red snapper	1	1	0	NO	17W_003_S361KL_M13F_H11_2_	GGCACGGCCCTAAGCCTGCTCATTCGAGCAGAGCTAAGCCAGCCAGGAGCTCTTCTTGGAGACGACCAGATTTATAATGTAATTGTTACAGCACACGCATTTGTAATAATTTTCTTTATAGTAATACCAATCATGATCGGAGGATTCGGGAACTGACTGATCCCATTAATAATTGGAGCCCCTGATATGGCATTCCCCCGAATAAATAACATGAGCTTTTGACTCCTCCCCCCGTCATTCCTGTTACTGCTCGCCTCTTCTGGAGTAGAAGCCGGTGCTGGAACTGGGTGGACAGTCTACCCGCCCCTAGCAGGCAACCTAGCACACGCAGGAGCATCTGTAGACCTAACTATTTTCTCCCTACATCTGGCAGGTGTCTCCTCAATTCTAGGGGCCATT…	BankIt2342942 Seq21 MT525066
62	2017-10-05	Grocery	Durham	$26.99/lb	22	Lutjanus campechanus	Red snapper	1	0.95	0	NO	20D_022_S3JC76_M13F_F09	TTTATCTAGTATTTGGTGCCTGGGCCGGAATAGTAGGCACGGCCCTAAGCCTGCTCATTCGAGCAGAGCTAAGCCAGCCAGGAGCTCTTCTTGGAGACGACCAGATTTATAATGTAATTGTTACAGCACACGCATTTGTAATAATTTTCTTTATAGTAATACCAATCATGATCGGAGGATTCGGGAACTGACTGATCCCATTAATAATTGGAGCCCCTGATATGGCATTCCCCCGAATAAATAACATGAGCTTTTGACTCCTCCCCCCGTCATTCCTGTTACTGCTCGCCTCTTCTGGAGTAGAAGCCGGTGCTGGAACTGGGTGGACAGTCTACCCGCCCCTAGCAGGCAACCTAGCACACGCAGGAGCATCTGTAGACCTAACTATTTTCTCCCTAC…	BankIt2342942 Seq22 MT525067
95	2017-10-21	Grocery	Winston Salem	$13.99/ lb	23	Lutjanus guttatus/synagris	Rose snapper/lane snapper	100/99%	98/97%	0/0	YES	21B_014_S3KL95_M13F_F05_1_	AAGCCTGCTCATTCGAGCAGAACTAAGCCAGCCAGGAGCTCTTCTTGGAGACGACCAGATTTATAATGTAATTGTTACAGCACATGCATTTGTAATAATTTTCTTTATAGTAATACCAATCATGATCGGAGGATTCGGGAACTGACTGATCCCATTAATAATCGGAGCCCCTGATATGGCATTCCCTCGAATAAATAACATGAGCTTTTGACTCCTTCCGCCATCATTCCTATTGCTACTCGCCTCTTCTGGAGTAGAAGCCGGTGCTGGAACTGGGTGAACAGTCTACCCTCCCCTAGCAGGAAACCTGGCACACGCGGGAGCATCTGTAGACCTAACTATTTTCTCCCTGCATTTAGCAGGTGTCTCTTCAATTCTAGGGGCCATCAACTTCATCAC…	BankIt2342942 Seq23 MT525068
99	2017-10-23	Grocery	Chapel Hill	$13.99/lb	24	Lutjanus guttatus/synagris	Rose snapper/lane snapper	0.99	1	0	YES	S3_AS_99_lutjanussynagris	TAGGCACGGCCCTAAGCCTGCTCATTCGAGCAGAACTAAGCCAGCCAGGAGCTCTTCTTGGAGACGACCAGATTTATAATGTAATTGTTACAGCACATGCATTTGTAATAATTTTCTTTATAGTAATACCAATCATGATCGGAGGATTCGGGAACTGACTGATCCCATTAATAATCGGAGCCCCTGATATGGCATTCCCTCGAATAAATAACATGAGCTTTTGACTCCTTCCGCCATCATTCCTATTGCTACTCGCCTCTTCTGGAGTAGAAGCCGGTGCTGGAACTGGGTGAACAGTCTACCCTCCCCTAGCAGGAAACCTGGCACACGCGGGAGCATCTGTAGACCTAACTATTTTCTCCCTGCATTTAGCAGGTGTCTCTTCAATTCTAGGGGCCA…	BankIt2342942 Seq24 MT525069
100	2017-10-24	Grocery	Durham	$13.99/lb	25	Lutjanus guttatus/synagris	Rose snapper/lane snapper	100% (both)	99% (both)	0	YES	26D_013_S3ME100_M13F_G04	GGAGACGACCAGATTTATAATGTAATTGTTACAGCACATGCATTTGTAATAATTTTCTTTATAGTAATACCAATCATGATCGGAGGATTCGGGAACTGACTGATCCCATTAATAATCGGAGCCCCTGATATGGCATTCCCTCGAATAAATAACATGAGCTTTTGACTCCTTCCGCCATCATTCCTATTGCTACTCGCCTCTTCTGGAGTAGAAGCCGGTGCTGGAACTGGGTGAACAGTCTACCCTCCCCTAGCAGGAAACCTGGCACACGCGGGAGCATCTGTAGACCTAACTATTTTCTCCCTGCATTTAGCAGGTGTCTCTTCAATTCTAGGGGCCATCAACTTCATCACAACAATTATCAACATGAAACCCCCTGCTATCTCCCAGTATCAAACA…	BankIt2342942 Seq25 MT525070
100	Sept. 21, 2017	Grocery	Durham	$19.99/ lb	26	Lutjanus guttatus/synagris	Rose snapper/lane snapper	99% / 99%	99% / 99%	0 / 0	YES	S3_ER_66_Lutjanus synagris	TGCTCATTCGAGCAGAACTAAGCCAGCCAGGAGCTCTTCTTGGAGACGACCAGATTTATAATGTAATTGTTACAGCACATGCATTTGTAATAATTTTCTTTATAGTAATACCAATCATGATCGGAGGATTCGGGAACTGACTGATCCCATTAATAATCGGAGCCCCTGATATGGCATTCCCTCGAATAAATAACATGAGCTTTTGACTCCTTCCGCCATCATTCCTATTGCTACTCGCCTCTTCTGGAGTAGAAGCCGGTGCTGGAACTGGGTGAACAGTCTACCCTCCCCTAGCAGGAAACCTGGCACACGCAGGAGCATCTGTAGACCTAACTATTTTCTCCCTGCATTTAGCAGGTGTCTCTTCAATTCTAGGGGCCATCAACTTCATCACAACAA…	BankIt2342942 Seq26 MT525071
63	2017-10-03	Restaurant	Raleigh	$17.95 +tax	27	Lutjanus guttatus/synagris	Rose snapper/lane snapper	1	1	0	YES	23C_002_KDL77_M13F_B07_1_	AAGCCTGCTCATTCGAGCAGAACTAAGCCAGCCAGGAGCTCTTCTTGGAGACGACCAGATTTATAATGTAATTGTTACAGCACATGCATTTGTAATAATTTTCTTTATAGTAATACCAATCATGATCGGAGGATTCGGGAACTGACTGATCCCATTAATAATCGGAGCCCCTGATATGGCATTCCCTCGAATAAATAACATGAGCTTTTGACTCCTTCCGCCATCATTCCTATTGCTACTCGCCTCTTCTGGAGTAGAAGCCGGTGCTGGAACTGGGTGAACAGTCTACCCTCCCCTAGCAGGAAACCTGGCACACGCGGGAGCATCTGTAGACCTAACTATTTTCTCCCTGCATTTAGCAGGTGTCTCTTCAATTCTAGGGGCCATCAACTTCATCAC…	BankIt2342942 Seq27 MT525072
64	2017-10-03	Restaurant	Raleigh	$14 +tax	28	Lutjanus guttatus/synagris	Rose snapper/lane snapper	1	1	0	YES	23C_011_KDL78_M13F_C08_1_	CTGCTCATTCGAGCAGAACTAAGCCAGCCAGGAGCTCTTCTTGGAGACGACCAGATTTATAATGTAATTGTTACAGCACATGCATTTGTAATAATTTTCTTTATAGTAATACCAATCATGATCGGAGGATTCGGGAACTGACTGATCCCATTAATAATCGGAGCCCCTGATATGGCATTCCCTCGAATAAATAACATGAGCTTTTGACTCCTTCCGCCATCATTCCTATTGCTACTCGCCTCTTCTGGAGTAGAAGCCGGTGCTGGAACTGGGTGAACAGTCTACCCTCCCCTAGCAGGAAACCTGGCACACGCGGGAGCATCTGTAGACCTAACTATTTTCTCCCTGCATTTAGCAGGTGTCTCTTCAATTCTAGGGGCCATCAACTTCATCACAACA…	BankIt2342942 Seq28 MT525073
65	2017-10-12	Grocery	Raleigh		29	Lutjanus purpureus	Southern red snapper	1	1	0	NO	20D_017_S3MF85_M13F_A09	TAAGCCTGCTCATTCGAGCAGAGCTAAGCCAGCCAGGAGCTCTTCTTGGAGACGACCAGATTTATAATGTAATTGTTACAGCACACGCATTTGTAATAATTTTCTTTATAGTAATACCAATCATGATCGGAGGATTCGGGAACTGACTGATCCCATTAATAATTGGAGCCCCTGATATGGCATTCCCCCGAATAAATAACATGAGCTTTTGACTCCTCCCCCCGTCATTCCTGTTACTGCTCGCCTCTTCTGGAGTAGAAGCCGGTGCTGGAACTGGGTGGACAGTCTACCCGCCCCTAGCAGGCAACCTAGCACACGCAGGAGCATCTGTAGACCTAACTATTTTCTCCCTACATCTGGCAGGTGTCTCCTCAATTCTAGGGGCCATTAATTTCATCA…	BankIt2342942 Seq29 MT525074
113	2017-11-02	Grocery	Greenville	14.99/lb	30	Rhomboplites aurorubens	Vermilion snapper	1	1	0	YES	20A_006_S3AS113_M13F_F01	GCTGCTCATTCGAGCAGAACTAAGCCAGCCAGGAGCTCTTCTTGGAGATGACCAGATTTACAATGTAATCGTTACAGCACATGCATTCGTAATAATTTTCTTTATAGTAATACCAATCATGATCGGAGGATTCGGGAACTGACTGATTCCCTTAATAATCGGGGCCCCTGATATGGCATTCCCTCGAATAAATAACATGAGCTTTTGACTCCTCCCCCCATCATTCCTGCTGCTACTCGCTTCTTCTGGGGTAGAAGCCGGCGCTGGGACTGGGTGAACAGTCTACCCTCCCCTAGCAGGGAACCTAGCACACGCGGGAGCATCTGTAGACCTGACTATTTTTTCCCTACATCTAGCAGGGGTCTCCTCGATTCTAGGGGCTATCAACTTCATTACAAC…	BankIt2342942 Seq30 MT525075
60	Sept. 21, 2017	Seafood market	Carrboro	$12.50/fish (NOTE only took cash)	31	Rhomboplites aurorubens	Vermilion snapper	1	1	0	YES	S3_AS_60_rhomboplitesaurorubens	NNCAATAAGATTCGGCCTTTCTGATATTATTTGGTGCCGGGGCCGGAATAATAGTTACGGGCGTAAGCCTGCTCATTCGAGCAGAACTAAGCCAGCCAGGAGCTCTTCTTGGAGATGACCAGATTTACAATGTAATCGTTACAGCACATGCATTCGTAATAATTTTCTTTATAGTAATACCAATCATGATCGGAGGATTCGGGAACTGACTGATTCCCTTAATAATCGGGGCCCCTGATATGGCATTCCCTCGAATAAATAACATGAGCTTTTGACTCCTCCCCCCATCATTCCTGCTGCTACTCGCTTCTTCTGGGGTAGAAGCCGGCGCTGGGACTGGGTGAACAGTCTACCCTCCCCTAGCAGGGAACCTAGCACACGCGGGAGCATCTGTAGACC…	BankIt2342942 Seq31 MT525076
93	2017-10-21	Seafood market	Winston Salem	$8.99/lb	32	Rhomboplites aurorubens	Vermilion snapper	0.99	0.99	0	YES	21B_012_S3KL93_M13F_D05_2_	AAGCCTGCTCATTCGAGCAGAACTAAGCCAGCCAGGAGCTCTTCTTGGAGATGACCAGATTTACAATGTAATCGTTACAGCACATGCATTCGTAATAATTTTCTTTATAGTAATACCAATCATGATCGGAGGATTCGGGAACTGACTGATTCCCTTAATAATCGGGGCCCCTGATATGGCATTCCCTCGAATAAATAACATGAGCTTTTGACTCCTCCCCCCATCATTCCTGCTGCTACTCGCTTCTTCTGGGGTAGAAGCCGGCGCTGGGACTGGGTGAACAGTCTACCCTCCCCTAGCAGGGAACCTAGCACACGCGGGAGCATCTGTAGACCTGACTATTTTTTCCCTACATCTAGCAGGGGTCTCCTCGATTCTAGGGGCTATCAACTTCATTAC…	BankIt2342942 Seq32 MT525077
94	2017-10-21	Seafood market	Winston Salem	$8.99 lb	33	Rhomboplites aurorubens	Vermilion snapper	0.99	0.99		YES	21B_013_S3KL94_M13F_E05_1_	GCTCATTCGAGCAGAACTAAGCCAGCCAGGAGCTCTTCTTGGAGATGACCAGATTTACAATGTAATCGTTACAGCACATGCATTCGTAATAATTTTCTTTATAGTAATACCAATCATGATCGGAGGATTCGGGAACTGACTGATTCCCTTAATAATCGGGGCCCCTGATATGGCATTCCCTCGAATAAATAACATGAGCTTTTGACTCCTCCCCCCATCATTCCTGCTGCTACTCGCTTCTTCTGGGGTAGAAGCCGGCGCTGGGACTGGGTGAACAGTCTACCCTCCCCTAGCAGGGAACCTAGCACACGCGGGAGCATCTGTAGACCTGACTATTTTTTCCCTACATCTAGCAGGGGTCTCCTCGATTCTAGGGGCTATCAACTTCATTACAACAAT…	BankIt2342942 Seq33 MT525078
110	2017-10-22	Seafood market	Wilson	$8.99/lb	34	Rhomboplites aurorubens	Vermilion snapper	1	0.99	0	YES	20D_021_S3EP110_M13F_E09	AAGCCTGCTCATTCGAGCAGAACTAAGCCAGCCAGGAGCTCTTCTTGGAGATGACCAGATTTACAATGTAATCGTTACAGCACATGCATTCGTAATAATTTTCTTTATAGTAATACCAATCATGATCGGAGGATTCGGGAACTGACTGATTCCCTTAATAATCGGGGCCCCTGATATGGCATTCCCTCGAATAAATAACATGAGCTTTTGACTCCTCCCCCCATCATTCCTGCTGCTACTCGCTTCTTCTGGGGTAGAAGCCGGCGCTGGGACTGGGTGAACAGTCTACCCTCCCCTAGCAGGGAACCTAGCACACGCGGGAGCATCTGTAGACCTGACTATTTTTTCCCTACATCTAGCAGGGGTCTCCTCGATTCTAGGGGCTATCAACTTCATTAC…	BankIt2342942 Seq34 MT525079
111	Sept. 21, 2017	Seafood market	Durham	$7.99/lb	35	Rhomboplites aurorubens	Vermilion snapper	1	1	0	YES	S3_PD__68_Rhomboplitesaurorubensab1	CTTAAGCCTGCTCATTCGAGCAGAACTAAGCCAGCCAGGAGCTCTTCTTGGAGATGACCAGATTTACAATGTAATCGTTACAGCACATGCATTCGTAATAATTTTCTTTATAGTAATACCAATCATGATCGGAGGATTCGGGAACTGACTGATTCCCTTAATAATCGGGGCCCCTGATATGGCATTCCCTCGAATAAATAACATGAGCTTTTGACTCCTCCCCCCATCATTCCTGCTGCTACTCGCTTCTTCTGGGGTAGAAGCCGGCGCTGGGACTGGGTGAACAGTCTACCCTCCCCTAGCAGGGAACCTAGCACACGCGGGAGCATCTGTAGACCTGACTATTTTTTCCCTACATCTAGCAGGGGTCTCCTCGATTCTAGGGGCTATCAACTTCAT…	BankIt2342942 Seq35 MT525080
114	2017-10-03	Seafood market	Raleigh	$15.46 (w/ tax)	36	Rhomboplites aurorubens	Vermilion snapper	1	0.99	0	YES	S3_SF_81_Rhomboplites Aurobens	GCCTGCTCATTCGAGCAGAACTAAGCCAGCCAGGAGCTCTTCTTGGAGATGACCAGATTTACAATGTAATCGTTACAGCACATGCATTCGTAATAATTTTCTTTATAGTAATACCAATCATGATCGGAGGATTCGGGAACTGACTGATTCCCTTAATAATCGGGGCCCCTGATATGGCATTCCCTCGAATAAATAACATGAGCTTTTGACTCCTCCCCCCATCATTCCTCCTGCTACTCGCTTCTTCTGGGGTAGAAGCCGGCGCTGGGACTGGGTGAACAGTCTACCCTCCCCTAGCAGGGAACCTAGCACACGCGGGAGCATCTGTAGACCTGACTATTTTTTCCCTACATCTAGCAGGGGTCTCCTCGATTCTAGGGGCTATCAACTTCATTACAA…	BankIt2342942 Seq36 MT525081
115	2017-10-03	Seafood market	Raleigh	$6.17 (w/ tax)	37	Rhomboplites aurorubens	Vermilion snapper	1	0.99	0	YES	S3_SF_82_Rhomboplites Aurobens	TGCTCATTCGAGCAGAACTAAGCCAGCCAGGAGCTCTTCTTGGAGATGACCAGATTTACAATGTAATCGTTACAGCACATGCATTCGTAATAATTTTCTTTATAGTAATACCAATCATGATCGGAGGATTCGGGAACTGACTGATTCCCTTAATAATCGGGGCCCCCGATATGGCATTCCCTCGAATAAATAACATGAGCTTTTGACTCCTCCCCCCATCATTCCTGCTGCTACTCGCTTCTTCTGGGGTAGAAGCCGGCGCTGGGACTGGGTGAACAGTCTACCCTCCCCTAGCAGGGAACCTAGCACACGCGGGAGCATCTGTAGACCTGACTATTTTTTCCCTACATCTAGCAGGGGTCTCCTCGATTCTAGGGGCTATCAACTTCATTACAACGA…	BankIt2342942 Seq37 MT525082
116	2017-10-03	Seafood market	Raleigh	$8.99 +tax	38	Rhomboplites aurorubens	Vermilion snapper	1	1	0	YES	S3_SF_83_Rhomboplites Aurobens	AGGCACGGGCTTAAGCCTGCTCATTCGAGCAGAACTAAGCCAGCCAGGAGCTCTTCTTGGAGATGACCAGATTTACAATGTAATCGTTACAGCACATGCATTCGTAATAATTTTCTTTATAGTAATACCAATCATGATCGGAGGATTCGGGAACTGACTGATTCCCTTAATAATCGGGGCCCCTGATATGGCATTCCCTCGAATAAATAACATGAGCTTTTGACTCCTCCCCCCATCATTCCTGCTGCTACTCGCTTCTTCTGGGGTAGAAGCCGGCGCTGGGACTGGGTGAACAGTCTACCCTCCCCTAGCAGGGAACCTAGCACACGCGGGAGCATCTGTAGACCTGACTATTTTTTCCCTACATCTAGCAGGGGTCTCCTCGATTCTAGGGGCTAT…	BankIt2342942 Seq38 MT525083
117	Oct 12,2017	Seafood market	Raleigh	$7.49/lb	39	Rhomboplites aurorubens	Vermilion snapper	1	0.98	0	YES	20D_015_S3JC86_M13F_G08	TCTATCTAGTATTTGGTGCCTGGGCCGGAATAGTAGGCACAGCCTTAAGCCTGCTCATTCGAGCAGAACTAAGCCAGCCAGGAGCTCTTCTTGGAGATGACCAGATTTACAATGTAATCGTTACAGCACATGCATTCGTAATAATTTTCTTTATAGTAATACCAATCATGATCGGAGGATTCGGGAACTGACTGATTCCCTTAATAATCGGGGCCCCTGATATGGCATTCCCTCGAATAAATAACATGAGCTTTTGACTCCTCCCCCCATCATTCCTGCTGCTACTCGCTTCTTCTGGGGTAGAAGCCGGCGCTGGGACTGGGTGAACAGTCTACCCTCCCCTAGCAGGGAACCTAGCACACGCGGGAGCATCTGTAGACCTGACTATTTTTTCCCTAC…	BankIt2342942 Seq39 MT525084
118	2017-10-12	Seafood market	Raleigh	$7.49/lb	40	Rhomboplites aurorubens	Vermilion snapper	1	1	0	YES	23E_002_S3JC87_M13F_F07	AGGCCTGCTCATTCGAGCAGAACTAAGCCAGCCAGGAGCTCTTCTTGGAGATGACCAGATTTACAATGTAATCGTTACAGCACATGCATTCGTAATAATTTTCTTTATAGTAATACCAATCATGATCGGAGGATTCGGGAACTGACTGATTCCCTTAATAATCGGGGCCCCTGATATGGCATTCCCTCGAATAAATAACATGAGCTTTTGACTCCTCCCCCCATCATTCCTGCTGCTACTCGCTTCTTCTGGGGTAGAAGCCGGCGCTGGGACTGGGTGAACAGTCTACCCTCCCCTAGCAGGGAACCTAGCACACGCGGGAGCATCTGTAGACCTGACTATTTTTTCCCTACATCTAGCAGGGGTCTCCTCGATTCTAGGGGCTATCAACTTCATTAC…	BankIt2342942 Seq40 MT525085
119	2017-10-19	Seafood market	Fayetteville	$8.99/lb	41	Rhomboplites aurorubens	Vermilion snapper	1	1	0	YES	S3_OG_88_Rhomboplites_aurorubens	CTTGGAGATGACCAGATTTACAATGTAATCGTTACAGCACATGCATTCGTAATAATTTTCTTTATAGTAATACCAATCATGATCGGAGGATTCGGGAACTGACTGATTCCCTTAATAATCGGGGCCCCTGATATGGCATTCCCTCGAATAAATAACATGAGCTTTTGACTCCTCCCCCCATCATTCCTGCTGCTACTCGCTTCTTCTGGGGTAGAAGCCGGCGCTGGGACTGGCCGAACAGTCTACCCTCCCCTAGCAGGGAACCTAGCACACGCGGCAGCATCTGTAGACCTGATTATTTTTTCCCTACATCTAGCAGGGGTCTCCTCGATTCTAGGGGCTATCAACTTCATTACAACGATTATTAACGTGAAGCCCCCTGCCATCTCCCAATATCAG…	BankIt2342942 Seq41 MT525086
120	2017-10-19	Seafood market	Fayetteville	$10.99/lb	42	Rhomboplites aurorubens	Vermilion snapper	1	1	0	YES	S3_OG_89_Rhomboplites_aurorubens	CTTCTTGGAGATGACCAGATTTACAATGTAATCGTTACAGCACATGCATTCGTAATAATTTTCTTTATAGTAATACCAATCATGATCGGAGGATTCGGGAACTGACTGATTCCCTTAATAATCGGGGCCCCTGATATGGCATTCCCTCGAATAAATAACATGAGCTTTTGACTCCTCCCCCCATCATTCCTGCTGCTACTCGCTTCTTCTGGGGTAGAAGCCGGCGCTGGGACTGGGTGAACAGTCTACCCTCCCCTAGCAGGGAACCTAGCACACGCGGGAGCATCTGTAGACCTGACTATTTTTTCCCTACATCTAGCAGGGGTCTCCTCGATTCTAGGGGCTATCAACTTCATTACAACGATTATTAACATGAAGCCCCCTGCCATCTCCCAATAT…	BankIt2342942 Seq42 MT525087
95	Sept. 21, 2017	Grocery	Durham	$7.99/lb ($8.72 w/tax)	43	Ocyurus chrysurus	Yellowtail snapper	0.99	1	0	YES	20G_005_S3AL65_M13F_E08	TTCGGTGCCTGGGCCGGATAGTAGGCACGGCCCTAAGCCTGCTCATTCGAGCAGAACTAAGCCAGCCAGGAGCTCTTCTTGGAGACGACCAGATTTATAATGTAATTGTTACAGCGCATGCATTTGTAATAATTTTCTTTATAGTAATACCAATCATGATCGGAGGATTCGGGAACTGACTGATCCCACTAATGATCGGGGCCCCCGACATGGCATTCCCTCGAATAAATAACATGAGCTTTTGACTCCTCCCGCCATCATTCCTATTGCTACTCGCCTCTTCTGGGGTAGAAGCCGGTGCTGGAACTGGGTGAACAGTTTACCCTCCCCTAGCAGGAAACCTAGCACACGCAGGAGCATCTGTAGACCTAACTATTTTCTCCCTGCATCTAGCAGGTG…	BankIt2342942 Seq43 MT525088
